# Supplementary material
Source: HighWire-hosted journal article supplement (https://jnm.snmjournals.org/highwire/filestream/94694/field_highwire_adjunct_files/0/157982_Supplemental_Data.pdf)
Supplement: 157982_Supplemental_Data.pdf [file 157982_Supplemental_Data.pdf]

## SUPPLEMENTAL METHODS

### PET/MR acquisition and analysis

PET data were acquired using the BrainPET, a MR compatible PET scanner that operates inside of a Magnetom TIM Trio 3T MRI (Siemens) and provides an axial field of view of ~20 cm, covering the whole rat body length. The list-mode emission data were rebinned in the sinogram space for fast reconstruction. The uncorrected PET volume was first reconstructed and binary segmented based on an empirically determined threshold in soft tissue and air. A uniform linear attenuation coefficient ( $0.096 \text{ cm}^{-1}$ , corresponding to water at 511 keV) was assigned to all soft tissue voxels and the resulting attenuation map (combined with the coil attenuation map) was forward projected to derive the attenuation correction factors in sinogram space. The scatter sinogram is obtained using a fully 3D scatter calculation method based on the single scatter estimation method. First the normalization and attenuation corrected emission volume is reconstructed. Second, a scatter estimate is obtained by Monte Carlo simulations from this volume and the attenuation map. Third, this scatter estimate is scaled axially to fit the tails of the normalized true data which accounts for the out of field of view scatter. The normalization was calculated from a 64 hr scan of a plane-source rotated in the FOV. The images were reconstructed with the ordinary Poisson ordered subsets expectation maximization (OP-OSEM) algorithm using 16 subsets and 6 iterations. The reconstructed volume consists of 153 slices with  $256 \times 256$  pixels ( $1.25 \times 1.25 \times 1.25 \text{ mm}^3$ ). The spatial resolution at the center of the field of view is approximately 2.5 mm. MR imaging was performed simultaneously to the PET acquisition. 3D gradient echo T1-weighted time-of-flight (TOF) MR angiography sequences were performed with an echo time of 3.86 ms, repetition time of 21 ms, flip angle of  $18^\circ$ , field of view =  $9 \times 18$  cm, bandwidth = 178 Hz/pixel, 2 averages, and an acquisition time of 15.3 min. TOF data was

reconstructed into  $256 \times 256 \times 128$  matrices with an in-plane pixel spacing of  $0.703 \times 0.703 \text{ mm}^2$ , and a slice thickness of 0.7 mm.

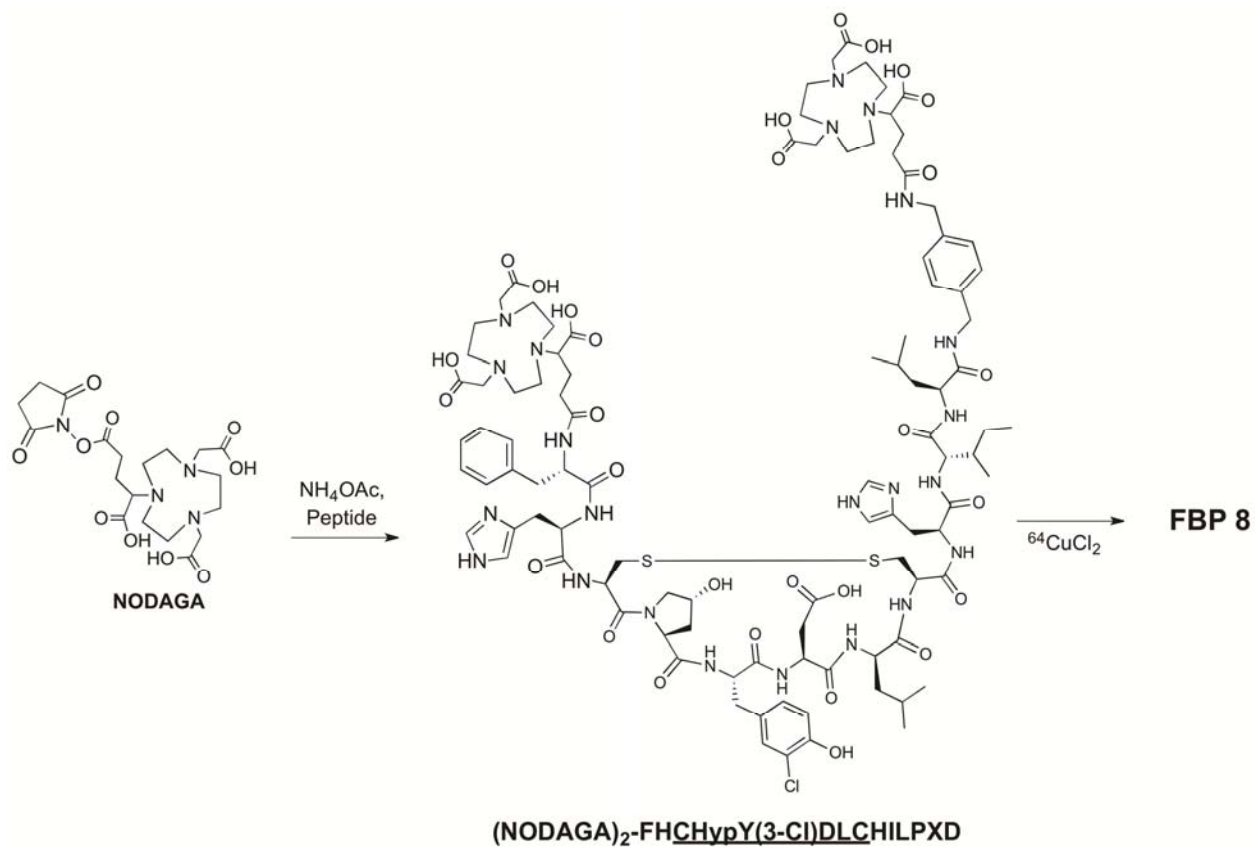

**Supplemental figure 1.** Synthesis and chemical structure of  $^{64}\text{Cu}$ -FBP8.

## Supplemental Table 1

OLINDA - Organ Level Internal Dose Assessment Code (copyright Vanderbilt University, 2003)

NOTE: This code gives doses for stylized models of average individuals - results should be applied with caution to specific human subjects.

NOTE: Users should always carefully check input data (shown below) and critically review the reported results.

Organ Doses (mSv/MBq), Nuclide: Cu-64 (1.27E01 hr), Adult Male

| Target Organ                        | Alpha    | Beta     | Photon   | Total    | EDE Cont. | ED Cont. |
|-------------------------------------|----------|----------|----------|----------|-----------|----------|
| Adrenals                            | 0.00E000 | 4.22E-05 | 7.35E-03 | 7.40E-03 | 4.44E-04  | 1.85E-05 |
| Brain                               | 0.00E000 | 1.13E-04 | 8.99E-05 | 2.03E-04 | 0.00E000  | 5.08E-07 |
| Breasts                             | 0.00E000 | 2.20E-04 | 6.20E-04 | 8.41E-04 | 1.26E-04  | 4.20E-05 |
| Gallbladder Wall                    | 0.00E000 | 2.20E-04 | 6.19E-03 | 6.41E-03 | 0.00E000  | 0.00E000 |
| LLI Wall                            | 0.00E000 | 2.20E-04 | 2.71E-03 | 2.93E-03 | 0.00E000  | 3.51E-04 |
| Small Intestine                     | 0.00E000 | 4.51E-03 | 3.22E-03 | 7.74E-03 | 4.64E-04  | 1.93E-05 |
| Stomach Wall                        | 0.00E000 | 6.06E-04 | 2.77E-03 | 3.38E-03 | 0.00E000  | 4.05E-04 |
| ULI Wall                            | 0.00E000 | 2.20E-04 | 3.24E-03 | 3.46E-03 | 0.00E000  | 8.64E-06 |
| Heart Wall                          | 0.00E000 | 3.91E-04 | 1.58E-03 | 1.97E-03 | 0.00E000  | 0.00E000 |
| Kidneys                             | 0.00E000 | 3.96E-01 | 4.47E-02 | 4.41E-01 | 2.64E-02  | 1.10E-02 |
| Liver                               | 0.00E000 | 2.56E-02 | 8.73E-03 | 3.44E-02 | 2.06E-03  | 1.72E-03 |
| Lungs                               | 0.00E000 | 1.15E-03 | 1.40E-03 | 2.55E-03 | 3.06E-04  | 3.06E-04 |
| Muscle                              | 0.00E000 | 2.20E-04 | 1.70E-03 | 1.92E-03 | 0.00E000  | 4.81E-06 |
| Ovaries                             | 0.00E000 | 9.86E-05 | 2.86E-03 | 2.96E-03 | 7.39E-04  | 5.91E-04 |
| Pancreas                            | 0.00E000 | 2.20E-04 | 5.44E-03 | 5.66E-03 | 0.00E000  | 1.42E-05 |
| Red Marrow                          | 0.00E000 | 1.59E-04 | 2.29E-03 | 2.45E-03 | 2.94E-04  | 2.94E-04 |
| Osteogenic Cells                    | 0.00E000 | 5.61E-04 | 1.25E-03 | 1.81E-03 | 5.42E-05  | 1.81E-05 |
| Skin                                | 0.00E000 | 2.20E-04 | 8.08E-04 | 1.03E-03 | 0.00E000  | 1.03E-05 |
| Spleen                              | 0.00E000 | 6.23E-04 | 5.78E-03 | 6.40E-03 | 0.00E000  | 1.60E-05 |
| Testes                              | 0.00E000 | 2.20E-04 | 1.47E-03 | 1.69E-03 | 0.00E000  | 0.00E000 |
| Thymus                              | 0.00E000 | 2.20E-04 | 5.86E-04 | 8.06E-04 | 0.00E000  | 2.02E-06 |
| Thyroid                             | 0.00E000 | 2.20E-04 | 2.51E-04 | 4.71E-04 | 1.41E-05  | 2.36E-05 |
| Urinary Bladder Wall                | 0.00E000 | 1.26E-01 | 2.00E-02 | 1.46E-01 | 8.76E-03  | 7.30E-03 |
| Uterus                              | 0.00E000 | 4.72E-04 | 5.12E-03 | 5.59E-03 | 0.00E000  | 1.40E-05 |
| Total Body                          | 0.00E000 | 2.64E-03 | 1.96E-03 | 4.60E-03 | 0.00E000  | 0.00E000 |
| Effective Dose Equivalent (mSv/MBq) |          |          |          |          | 3.97E-02  |          |

Effective Dose (mSv/MBq)

2.22E-02

Organ Doses (rem/mCi), Nuclide: Cu-64 (1.27E01 hr), Adult Male

| Target Organ         | Alpha    | Beta     | Photon   | Total    | EDE Cont. | ED Cont. |
|----------------------|----------|----------|----------|----------|-----------|----------|
| Adrenals             | 0.00E000 | 1.56E-04 | 2.72E-02 | 2.74E-02 | 1.64E-03  | 6.84E-05 |
| Brain                | 0.00E000 | 4.19E-04 | 3.33E-04 | 7.52E-04 | 0.00E000  | 1.88E-06 |
| Breasts              | 0.00E000 | 8.15E-04 | 2.30E-03 | 3.11E-03 | 4.67E-04  | 1.56E-04 |
| Gallbladder Wall     | 0.00E000 | 8.15E-04 | 2.29E-02 | 2.37E-02 | 0.00E000  | 0.00E000 |
| LLI Wall             | 0.00E000 | 8.15E-04 | 1.00E-02 | 1.08E-02 | 0.00E000  | 1.30E-03 |
| Small Intestine      | 0.00E000 | 1.67E-02 | 1.19E-02 | 2.86E-02 | 1.72E-03  | 7.16E-05 |
| Stomach Wall         | 0.00E000 | 2.24E-03 | 1.02E-02 | 1.25E-02 | 0.00E000  | 1.50E-03 |
| ULI Wall             | 0.00E000 | 8.15E-04 | 1.20E-02 | 1.28E-02 | 0.00E000  | 3.20E-05 |
| Heart Wall           | 0.00E000 | 1.45E-03 | 5.85E-03 | 7.30E-03 | 0.00E000  | 0.00E000 |
| Kidneys              | 0.00E000 | 1.46E000 | 1.66E-01 | 1.63E000 | 9.78E-02  | 4.08E-02 |
| Liver                | 0.00E000 | 9.49E-02 | 3.23E-02 | 1.27E-01 | 7.63E-03  | 6.36E-03 |
| Lungs                | 0.00E000 | 4.25E-03 | 5.17E-03 | 9.42E-03 | 1.13E-03  | 1.13E-03 |
| Muscle               | 0.00E000 | 8.15E-04 | 6.31E-03 | 7.12E-03 | 0.00E000  | 1.78E-05 |
| Ovaries              | 0.00E000 | 3.65E-04 | 1.06E-02 | 1.09E-02 | 2.74E-03  | 2.19E-03 |
| Pancreas             | 0.00E000 | 8.15E-04 | 2.01E-02 | 2.09E-02 | 0.00E000  | 5.24E-05 |
| Red Marrow           | 0.00E000 | 5.87E-04 | 8.47E-03 | 9.06E-03 | 1.09E-03  | 1.09E-03 |
| Osteogenic Cells     | 0.00E000 | 2.07E-03 | 4.61E-03 | 6.69E-03 | 2.01E-04  | 6.69E-05 |
| Skin                 | 0.00E000 | 8.15E-04 | 2.99E-03 | 3.80E-03 | 0.00E000  | 3.80E-05 |
| Spleen               | 0.00E000 | 2.31E-03 | 2.14E-02 | 2.37E-02 | 0.00E000  | 5.92E-05 |
| Testes               | 0.00E000 | 8.15E-04 | 5.43E-03 | 6.24E-03 | 0.00E000  | 0.00E000 |
| Thymus               | 0.00E000 | 8.15E-04 | 2.17E-03 | 2.98E-03 | 0.00E000  | 7.46E-06 |
| Thyroid              | 0.00E000 | 8.15E-04 | 9.29E-04 | 1.74E-03 | 5.23E-05  | 8.72E-05 |
| Urinary Bladder Wall | 0.00E000 | 4.66E-01 | 7.40E-02 | 5.40E-01 | 3.24E-02  | 2.70E-02 |
| Uterus               | 0.00E000 | 1.75E-03 | 1.89E-02 | 2.07E-02 | 0.00E000  | 5.17E-05 |
| Total Body           | 0.00E000 | 9.75E-03 | 7.26E-03 | 1.70E-02 | 0.00E000  | 0.00E000 |

Effective Dose Equivalent (rem/mCi)

1.47E-01

Effective Dose (rem/mCi)

8.20E-02

Number of Disintegrations in Source Organs:

|          |          |                        |
|----------|----------|------------------------|
| Adrenals | 9.60E-06 | MBq-h/MBq or uCi-h/uCi |
| Brain    | 2.24E-03 | MBq-h/MBq or uCi-h/uCi |
| Breasts  | 0.00E000 | MBq-h/MBq or uCi-h/uCi |

|                          |          |                        |
|--------------------------|----------|------------------------|
| Gallbladder Contents     | 0.00E000 | MBq-h/MBq or uCi-h/uCi |
| LLI                      | 0.00E000 | MBq-h/MBq or uCi-h/uCi |
| Small Intestine          | 5.06E-02 | MBq-h/MBq or uCi-h/uCi |
| Stomach                  | 2.80E-03 | MBq-h/MBq or uCi-h/uCi |
| ULI                      | 0.00E000 | MBq-h/MBq or uCi-h/uCi |
| Heart Contents           | 0.00E000 | MBq-h/MBq or uCi-h/uCi |
| Heart Wall               | 1.72E-03 | MBq-h/MBq or uCi-h/uCi |
| Kidneys                  | 1.65E000 | MBq-h/MBq or uCi-h/uCi |
| Liver                    | 6.82E-01 | MBq-h/MBq or uCi-h/uCi |
| Lungs                    | 1.60E-02 | MBq-h/MBq or uCi-h/uCi |
| Muscle                   | 0.00E000 | MBq-h/MBq or uCi-h/uCi |
| Ovaries                  | 1.20E-05 | MBq-h/MBq or uCi-h/uCi |
| Pancreas                 | 0.00E000 | MBq-h/MBq or uCi-h/uCi |
| Red Marrow               | 0.00E000 | MBq-h/MBq or uCi-h/uCi |
| Cortical Bone            | 0.00E000 | MBq-h/MBq or uCi-h/uCi |
| Trabecular Bone          | 0.00E000 | MBq-h/MBq or uCi-h/uCi |
| Spleen                   | 1.59E-03 | MBq-h/MBq or uCi-h/uCi |
| Testes                   | 0.00E000 | MBq-h/MBq or uCi-h/uCi |
| Thymus                   | 0.00E000 | MBq-h/MBq or uCi-h/uCi |
| Thyroid                  | 0.00E000 | MBq-h/MBq or uCi-h/uCi |
| Urinary Bladder Contents | 7.39E-01 | MBq-h/MBq or uCi-h/uCi |
| Uterus/Uterine Wall      | 5.20E-04 | MBq-h/MBq or uCi-h/uCi |
| Remainder                | 2.26E-01 | MBq-h/MBq or uCi-h/uCi |

Dynamic bladder model used:

Fraction: 0.81

T-bio: 0.89 hr

Fraction: 0.15

T-bio: 6.3 hr

Void Interval: 1.5 hr

Target Organ Masses:

|                  |            |
|------------------|------------|
| Adrenals         | 1.63E001 g |
| Brain            | 1.42E003 g |
| Breasts          | 3.51E002 g |
| Gallbladder Wall | 1.05E001 g |
| LLI Wall         | 1.67E002 g |
| Small Intestine  | 6.77E002 g |
| Stomach Wall     | 1.58E002 g |

|                      |            |
|----------------------|------------|
| ULI Wall             | 2.20E002 g |
| Heart Wall           | 3.16E002 g |
| Kidneys              | 2.99E002 g |
| Liver                | 1.91E003 g |
| Lungs                | 1.00E003 g |
| Muscle               | 2.80E004 g |
| Ovaries              | 8.71E000 g |
| Pancreas             | 9.43E001 g |
| Red Marrow           | 1.12E003 g |
| Osteogenic Cells     | 1.20E002 g |
| Skin                 | 3.01E003 g |
| Spleen               | 1.83E002 g |
| Testes               | 3.91E001 g |
| Thymus               | 2.09E001 g |
| Thyroid              | 2.07E001 g |
| Urinary Bladder Wall | 4.76E001 g |
| Uterus               | 7.90E001 g |
| Total Body           | 7.37E004 g |

\* Mass modified by user

Radiation Weighting Factors:

Alpha: 5.00E00  
Beta: 1.00E00  
Photon: 1.00E00

\*\* Weighting factor modified by user

OLINDA - Organ Level Internal Dose Assessment Code (copyright Vanderbilt University, 2003)

NOTE: This code gives doses for stylized models of average individuals - results should be applied with caution to specific human subjects.

NOTE: Users should always carefully check input data (shown below) and critically review the reported results.

Organ Doses (mSv/MBq), Nuclide: Cu-64 (1.27E01 hr), Adult Female

| Target Organ                        | Alpha    | Beta     | Photon   | Total    | EDE Cont. | ED Cont. |
|-------------------------------------|----------|----------|----------|----------|-----------|----------|
| Adrenals                            | 0.00E000 | 4.91E-05 | 9.67E-03 | 9.72E-03 | 5.83E-04  | 2.43E-05 |
| Brain                               | 0.00E000 | 1.34E-04 | 1.14E-04 | 2.48E-04 | 0.00E000  | 6.19E-07 |
| Breasts                             | 0.00E000 | 2.85E-04 | 7.73E-04 | 1.06E-03 | 1.59E-04  | 5.29E-05 |
| Gallbladder Wall                    | 0.00E000 | 2.85E-04 | 7.04E-03 | 7.32E-03 | 0.00E000  | 0.00E000 |
| LLI Wall                            | 0.00E000 | 2.85E-04 | 3.47E-03 | 3.75E-03 | 0.00E000  | 4.50E-04 |
| Small Intestine                     | 0.00E000 | 5.13E-03 | 4.28E-03 | 9.41E-03 | 5.64E-04  | 2.35E-05 |
| Stomach Wall                        | 0.00E000 | 7.22E-04 | 3.19E-03 | 3.91E-03 | 0.00E000  | 4.70E-04 |
| ULI Wall                            | 0.00E000 | 2.85E-04 | 4.06E-03 | 4.34E-03 | 0.00E000  | 1.09E-05 |
| Heart Wall                          | 0.00E000 | 5.15E-04 | 2.08E-03 | 2.60E-03 | 0.00E000  | 0.00E000 |
| Kidneys                             | 0.00E000 | 4.30E-01 | 4.80E-02 | 4.78E-01 | 2.87E-02  | 1.20E-02 |
| Liver                               | 0.00E000 | 3.50E-02 | 1.07E-02 | 4.56E-02 | 2.74E-03  | 2.28E-03 |
| Lungs                               | 0.00E000 | 1.44E-03 | 1.94E-03 | 3.38E-03 | 4.05E-04  | 4.05E-04 |
| Muscle                              | 0.00E000 | 2.85E-04 | 2.10E-03 | 2.39E-03 | 0.00E000  | 5.97E-06 |
| Ovaries                             | 0.00E000 | 7.81E-05 | 3.78E-03 | 3.85E-03 | 9.64E-04  | 7.71E-04 |
| Pancreas                            | 0.00E000 | 2.85E-04 | 6.40E-03 | 6.69E-03 | 0.00E000  | 1.67E-05 |
| Red Marrow                          | 0.00E000 | 1.97E-04 | 2.71E-03 | 2.91E-03 | 3.49E-04  | 3.49E-04 |
| Osteogenic Cells                    | 0.00E000 | 7.70E-04 | 1.66E-03 | 2.43E-03 | 7.30E-05  | 2.43E-05 |
| Skin                                | 0.00E000 | 2.85E-04 | 9.57E-04 | 1.24E-03 | 0.00E000  | 1.24E-05 |
| Spleen                              | 0.00E000 | 7.60E-04 | 7.12E-03 | 7.88E-03 | 0.00E000  | 1.97E-05 |
| Thymus                              | 0.00E000 | 2.85E-04 | 7.37E-04 | 1.02E-03 | 0.00E000  | 2.56E-06 |
| Thyroid                             | 0.00E000 | 2.85E-04 | 2.79E-04 | 5.65E-04 | 1.69E-05  | 2.82E-05 |
| Urinary Bladder Wall                | 0.00E000 | 1.66E-01 | 3.20E-02 | 1.98E-01 | 1.19E-02  | 9.91E-03 |
| Uterus                              | 0.00E000 | 4.66E-04 | 6.03E-03 | 6.50E-03 | 0.00E000  | 1.63E-05 |
| Total Body                          | 0.00E000 | 3.41E-03 | 2.44E-03 | 5.85E-03 | 0.00E000  | 0.00E000 |
| Effective Dose Equivalent (mSv/MBq) |          |          |          |          | 4.65E-02  |          |
| Effective Dose (mSv/MBq)            |          |          |          |          |           | 2.68E-02 |

Organ Doses (rem/mCi), Nuclide: Cu-64 (1.27E01 hr), Adult Female



| Target Organ                        | Alpha    | Beta     | Photon   | Total    | EDE Cont. | ED Cont. |
|-------------------------------------|----------|----------|----------|----------|-----------|----------|
| Adrenals                            | 0.00E000 | 1.82E-04 | 3.58E-02 | 3.59E-02 | 2.16E-03  | 8.99E-05 |
| Brain                               | 0.00E000 | 4.96E-04 | 4.21E-04 | 9.17E-04 | 0.00E000  | 2.29E-06 |
| Breasts                             | 0.00E000 | 1.06E-03 | 2.86E-03 | 3.91E-03 | 5.87E-04  | 1.96E-04 |
| Gallbladder Wall                    | 0.00E000 | 1.06E-03 | 2.60E-02 | 2.71E-02 | 0.00E000  | 0.00E000 |
| LLI Wall                            | 0.00E000 | 1.06E-03 | 1.28E-02 | 1.39E-02 | 0.00E000  | 1.67E-03 |
| Small Intestine                     | 0.00E000 | 1.90E-02 | 1.58E-02 | 3.48E-02 | 2.09E-03  | 8.70E-05 |
| Stomach Wall                        | 0.00E000 | 2.67E-03 | 1.18E-02 | 1.45E-02 | 0.00E000  | 1.74E-03 |
| ULI Wall                            | 0.00E000 | 1.06E-03 | 1.50E-02 | 1.61E-02 | 0.00E000  | 4.02E-05 |
| Heart Wall                          | 0.00E000 | 1.90E-03 | 7.71E-03 | 9.62E-03 | 0.00E000  | 0.00E000 |
| Kidneys                             | 0.00E000 | 1.59E000 | 1.78E-01 | 1.77E000 | 1.06E-01  | 4.43E-02 |
| Liver                               | 0.00E000 | 1.29E-01 | 3.94E-02 | 1.69E-01 | 1.01E-02  | 8.44E-03 |
| Lungs                               | 0.00E000 | 5.31E-03 | 7.18E-03 | 1.25E-02 | 1.50E-03  | 1.50E-03 |
| Muscle                              | 0.00E000 | 1.06E-03 | 7.78E-03 | 8.84E-03 | 0.00E000  | 2.21E-05 |
| Ovaries                             | 0.00E000 | 2.89E-04 | 1.40E-02 | 1.43E-02 | 3.57E-03  | 2.85E-03 |
| Pancreas                            | 0.00E000 | 1.06E-03 | 2.37E-02 | 2.48E-02 | 0.00E000  | 6.19E-05 |
| Red Marrow                          | 0.00E000 | 7.29E-04 | 1.00E-02 | 1.08E-02 | 1.29E-03  | 1.29E-03 |
| Osteogenic Cells                    | 0.00E000 | 2.85E-03 | 6.15E-03 | 9.00E-03 | 2.70E-04  | 9.00E-05 |
| Skin                                | 0.00E000 | 1.06E-03 | 3.54E-03 | 4.60E-03 | 0.00E000  | 4.60E-05 |
| Spleen                              | 0.00E000 | 2.81E-03 | 2.64E-02 | 2.92E-02 | 0.00E000  | 7.29E-05 |
| Thymus                              | 0.00E000 | 1.06E-03 | 2.73E-03 | 3.78E-03 | 0.00E000  | 9.45E-06 |
| Thyroid                             | 0.00E000 | 1.06E-03 | 1.03E-03 | 2.09E-03 | 6.27E-05  | 1.04E-04 |
| Urinary Bladder Wall                | 0.00E000 | 6.15E-01 | 1.19E-01 | 7.34E-01 | 4.40E-02  | 3.67E-02 |
| Uterus                              | 0.00E000 | 1.72E-03 | 2.23E-02 | 2.41E-02 | 0.00E000  | 6.01E-05 |
| Total Body                          | 0.00E000 | 1.26E-02 | 9.03E-03 | 2.17E-02 | 0.00E000  | 0.00E000 |
| Effective Dose Equivalent (rem/mCi) |          |          |          |          | 1.72E-01  |          |
| Effective Dose (rem/mCi)            |          |          |          |          |           | 9.93E-02 |

Number of Disintegrations in Source Organs:

|                      |          |                        |
|----------------------|----------|------------------------|
| Adrenals             | 9.60E-06 | MBq-h/MBq or uCi-h/uCi |
| Brain                | 2.24E-03 | MBq-h/MBq or uCi-h/uCi |
| Breasts              | 0.00E000 | MBq-h/MBq or uCi-h/uCi |
| Gallbladder Contents | 0.00E000 | MBq-h/MBq or uCi-h/uCi |
| LLI                  | 0.00E000 | MBq-h/MBq or uCi-h/uCi |
| Small Intestine      | 5.06E-02 | MBq-h/MBq or uCi-h/uCi |
| Stomach              | 2.80E-03 | MBq-h/MBq or uCi-h/uCi |

|                          |          |                        |
|--------------------------|----------|------------------------|
| ULI                      | 0.00E000 | MBq-h/MBq or uCi-h/uCi |
| Heart Contents           | 0.00E000 | MBq-h/MBq or uCi-h/uCi |
| Heart Wall               | 1.72E-03 | MBq-h/MBq or uCi-h/uCi |
| Kidneys                  | 1.65E000 | MBq-h/MBq or uCi-h/uCi |
| Liver                    | 6.82E-01 | MBq-h/MBq or uCi-h/uCi |
| Lungs                    | 1.60E-02 | MBq-h/MBq or uCi-h/uCi |
| Muscle                   | 0.00E000 | MBq-h/MBq or uCi-h/uCi |
| Ovaries                  | 1.20E-05 | MBq-h/MBq or uCi-h/uCi |
| Pancreas                 | 0.00E000 | MBq-h/MBq or uCi-h/uCi |
| Red Marrow               | 0.00E000 | MBq-h/MBq or uCi-h/uCi |
| Cortical Bone            | 0.00E000 | MBq-h/MBq or uCi-h/uCi |
| Trabecular Bone          | 0.00E000 | MBq-h/MBq or uCi-h/uCi |
| Spleen                   | 1.59E-03 | MBq-h/MBq or uCi-h/uCi |
| Thymus                   | 0.00E000 | MBq-h/MBq or uCi-h/uCi |
| Thyroid                  | 0.00E000 | MBq-h/MBq or uCi-h/uCi |
| Urinary Bladder Contents | 7.39E-01 | MBq-h/MBq or uCi-h/uCi |
| Uterus/Uterine Wall      | 5.20E-04 | MBq-h/MBq or uCi-h/uCi |
| Remainder                | 2.26E-01 | MBq-h/MBq or uCi-h/uCi |

Dynamic bladder model used:

Fraction: 0.81

T-bio: 0.89 hr

Fraction: 0.15

T-bio: 6.3 hr

Void Interval: 1.5 hr

Target Organ Masses:

|                  |            |
|------------------|------------|
| Adrenals         | 1.40E001 g |
| Brain            | 1.20E003 g |
| Breasts          | 3.60E002 g |
| Gallbladder Wall | 8.00E000 g |
| LLI Wall         | 1.60E002 g |
| Small Intestine  | 6.00E002 g |
| Stomach Wall     | 1.40E002 g |
| ULI Wall         | 2.00E002 g |
| Heart Wall       | 2.40E002 g |
| Kidneys          | 2.75E002 g |
| Liver            | 1.40E003 g |
| Lungs            | 8.00E002 g |

|                      |            |
|----------------------|------------|
| Muscle               | 1.70E004 g |
| Ovaries              | 1.10E001 g |
| Pancreas             | 8.50E001 g |
| Red Marrow           | 1.30E003 g |
| Osteogenic Cells     | 9.00E001 g |
| Skin                 | 1.79E003 g |
| Spleen               | 1.50E002 g |
| Thymus               | 2.00E001 g |
| Thyroid              | 1.70E001 g |
| Urinary Bladder Wall | 3.59E001 g |
| Uterus               | 8.00E001 g |
| Total Body           | 5.69E004 g |

\* Mass modified by user

Radiation Weighting Factors:

|         |         |
|---------|---------|
| Alpha:  | 5.00E00 |
| Beta:   | 1.00E00 |
| Photon: | 1.00E00 |

\*\* Weighting factor modified by user

**Supplemental video 1.** 3D rendering of a representative rat injected with  $^{64}\text{Cu}$ -FBP8 after pulmonary embolism showing clear embolus detection with PET imaging and low background signal.
